4. Yu B, Muenster S, Blaesi AH, Bloch DB, Zapol WM: Producing nitric oxide by pulsed electrical discharge in air for portable inhalation therapy. *Sci Transl Med* 2015; 7:294ra107
5. Yu B, Blaesi AH, Casey N, Raykhtsaum G, Zazzeron L, Jones R, Morrese A, Dobrynin D, Malhotra R, Bloch DB, Goldstein LE, Zapol WM: Detection and removal of impurities in nitric oxide generated from air by pulsed electrical discharge. *Nitric Oxide* 2016; 60:16–23
6. Berra L, Rodriguez-Lopez J, Rezoagli E, Yu B, Fisher DF, Semigran MJ, Bloch DB, Channick RN, Zapol WM: Electric plasma-generated nitric oxide: Hemodynamic effects in patients with pulmonary hypertension. *Am J Respir Crit Care Med* 2016; 194:1168–70
7. Yu B, Ferrari M, Schleifer G, Blaesi AH, Wepler M, Zapol WM, Bloch DB: Development of a portable mini-generator to safely produce nitric oxide for the treatment of infants with pulmonary hypertension. *Nitric Oxide* 2018; 75:70–6

## ANESTHESIOLOGY REFLECTIONS FROM THE WOOD LIBRARY-MUSEUM

## The On-call Anesthesiologist: A Physiological Fireman?

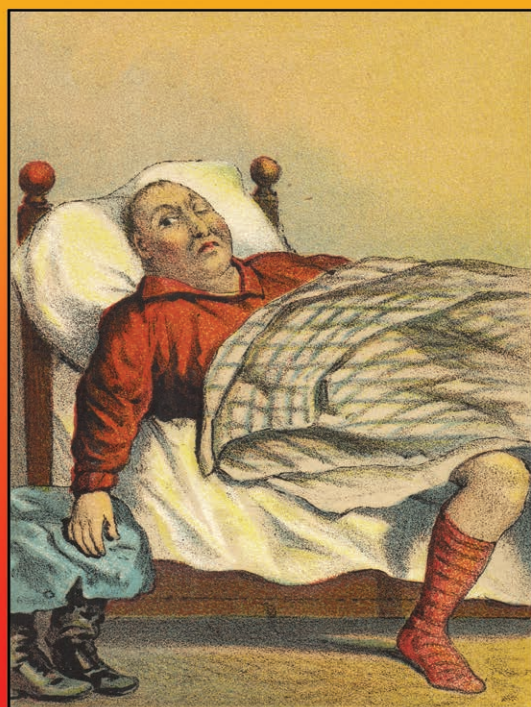

# The Fireman

**Cosack & Co.**

**Buffalo, NY**

Cosack & Company's 1881 image of *The Fireman* depicts a partially dressed rescuer prepared to leap out of bed—with his right foot planted on the floor and his right hand resting on his trouser-covered fire boots. Ready to launch from sleep at a moment's notice, the fireman reminds me of the on-call anesthesiologist. Rather than extinguishing flames, the physician-anesthetist is prepared to battle the heat of malignant hyperthermia. Whether racing off to command an airway or to administer unscheduled anesthetics for ambulated traumas, "takeback" open-heart cases, or emergency C-sections, the on-call anesthesiologist, like Cosack's fireman, often sleeps less than restfully.... (Copyright © the American Society of Anesthesiologists' Wood Library-Museum of Anesthesiology.)

*George S. Bause, M.D., M.P.H., Honorary Curator and Laureate of the History of Anesthesia, Wood Library-Museum of Anesthesiology, Schaumburg, Illinois, and Clinical Associate Professor, Case Western Reserve University, Cleveland, Ohio. UJYC@aol.com.*
